# Supplementary material
Source: PubMed Central journal article supplement (PMC1691560)

This is an electronic appendix to the paper by Russell *et al.* 2003 *A priori* prediction of disease invasion dynamics in a novel environment. *Proc. R. Soc. Lond. B* **271**, 21–25. (DOI 10.1098/rspb.2003.2559.)

Electronic appendices are refereed with the text. However, no attempt is made to impose a uniform editorial style on the electronic appendices.

**Electronic appendix A.** Figure 5. Distribution of distances between adjacent neighbours in Connecticut and New York.

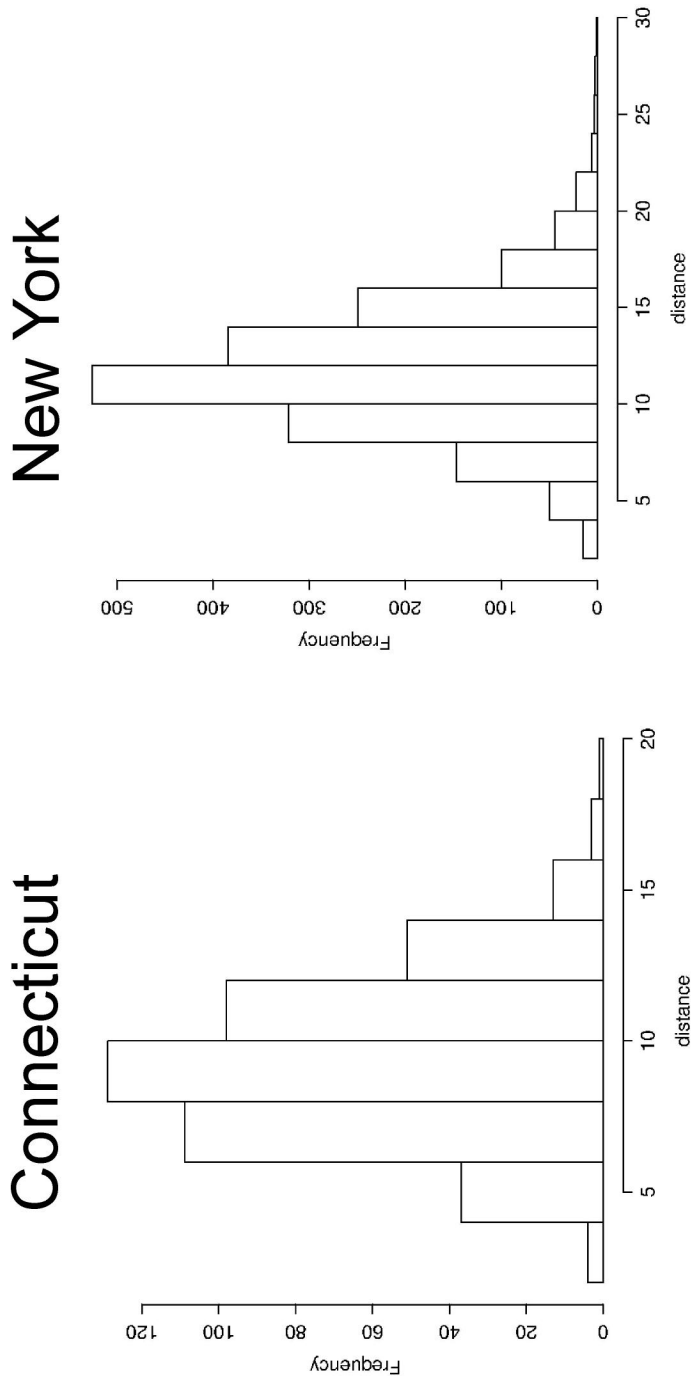

## Distance to adjacent townships in kilometers.

### Electronic appendix B

The movie shows the invasion of raccoon rabies in New York State from January 1991 to January 1995. The frame on the left shows the observed data from the New York Department of Health. The frame on the right shows the model predictions. The movie plots a frame every two months.

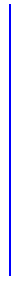

Supplement: 15002767s01.pdf [file 15002767s01.pdf]
